# Supplementary material
Source: publisher figshare collection journal article supplement (https://sage.figshare.com/ndownloader/files/12944204)
Supplement: Supplementary file 1 [file 12944204]

## Online Appendix A

Table 3.

| Ad                             | Branded Product                  | Portrayal                                                                                                                                                                                                                              |
|--------------------------------|----------------------------------|----------------------------------------------------------------------------------------------------------------------------------------------------------------------------------------------------------------------------------------|
| Non-sexual Less Energy Dense 1 | Nature Valley Granola Bars       | A woman rides her bike through a mountainous trail and then stops to admire the view while eating a granola bar                                                                                                                        |
| Non-sexual Less Energy Dense 2 | Kashi Grain cereal               | The components of the cereal are shown in both raw and processed forms in various locations with different people tasting them                                                                                                         |
| Non-sexual More Energy Dense 1 | Little Debbie Snack cakes        | A grandfather and son are shown eating different versions of the snack cakes while doing different activities together                                                                                                                 |
| Non-sexual More Energy Dense 2 | Quaker Oats Cookies              | A woman is taking out her garbage while about to eat a cookie in her hand. She stops to talk to her neighbor and her neighbor leans over and takes a giant bite out of the cookie.                                                     |
| Sexual Less Energy Dense 1     | Carls' Jr. Grilled Chicken Salad | An attractive woman is eating salad in bed and talking about it in a sultry voice. She is eating dripping bites of salad with her hand as the camera closes in on her lips and cleavage. She takes a bath with the salad to get clean. |
| Sexual Less Energy Dense 2     | Bolthouse Farms Baby carrots     | An attractive woman in a tight dress is eating enjoying the taste of baby carrots and saying "Oh, baby." A Barry White voice and music sound-alike is playing in the background.                                                       |
| Sexual More Energy Dense 1     | Dove Ice cream bars              | An attractive woman is eating an ice cream bar and sucking and licking cream off her fingers while eating it.                                                                                                                          |
| Sexual More Energy Dense 2     | Zokoko Chocolate                 | Men and women are touching, kissing and licking chocolate off each other's skin.                                                                                                                                                       |

## Online Appendix B

**Psychophysiological Metric Collection Procedures**

**Heart Rate (HR).** Heart rate (HR) was collected as an indicator of attentional resource allocation. It was recorded by using two standard 8mm Ag-AgCL electrodes placed on the right and left forearms. A ground electrode was placed on the non-dominant forearm. Heart rate data were computed by constructing a weighted average of R-spikes in the electrocardiogram waveform present in beats per minute per second. Movement artefact were removed using interpolation methods.

**Facial electromyography (EMG).** Facial electromyography (EMG) was collected as an indicator of the direction of motivational activation and emotion across exposure to the food ads. EMG was recorded over the left orbicularis oculi (*OO*; smiling) and corrugator supercilii (*CS*; frowning) muscle groups using miniature floating 4mm Ag-AgCl electrodes. Activation in the *OO* muscle group is used as an indicator of appetitive motivational activation and positive emotional response, while activation in the *CS* muscle group is used as an indicator of aversive motivational activation and negative emotional response (Fridlund & Cacioppo, 1986; P. Lang et al., 1993; A. Lang, Potter, & Bolls, 2009; Potter & Bolls, 2012). The signal was amplified and filtered with a high-pass filter set at 90Hz and a low-pass filter set at 1000Hz. The signal was rectified, integrated and sampled at 1000Hz. Data were averaged for each half-second.

**Skin Conductivity Level (SCL).** Skin conductivity level (SCL) was collected as an indicator of sympathetic arousal or intensity of motivational activation (A. Lang et al., 2009; Potter & Bolls, 2012). It was recorded by placing two standard 8mm Ag/AgCl disposable electrodes on the palm of each participant's non-dominant hand. Tonic skin conductance level was recorded using a Biopac MP150 wireless bio-amplifier that passed 0.5v across the electrodes. Raw data were sampled 1000 times per second.

## Online Appendix C

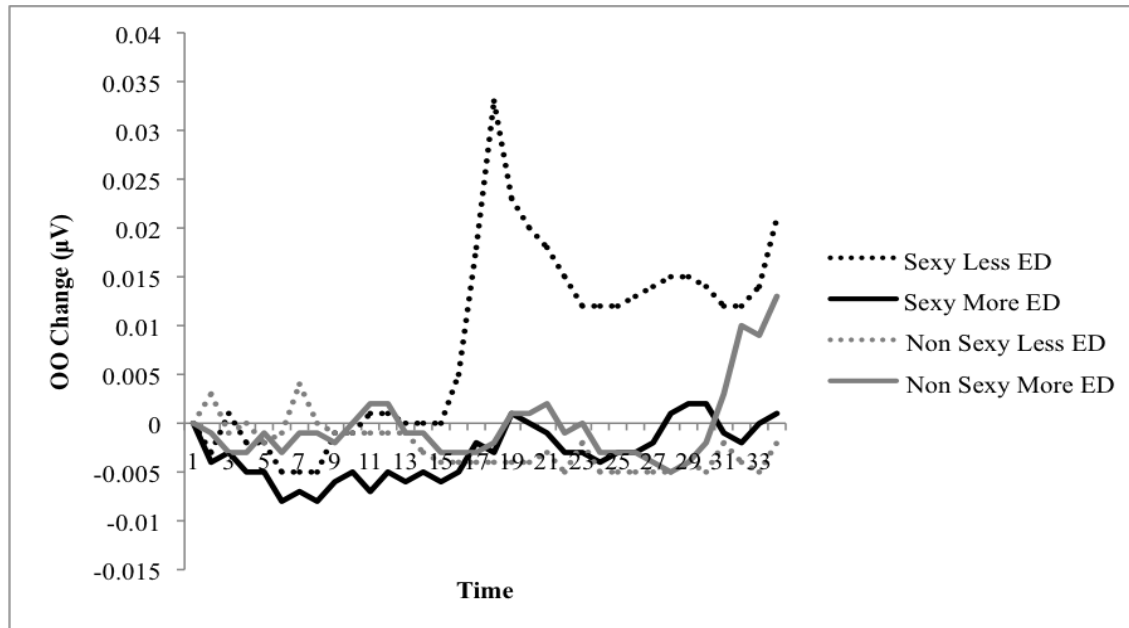

Figure 5. Orbicularis Oculi (OO) muscle activation change over times as a function of sexual appeal and energy density (ED)

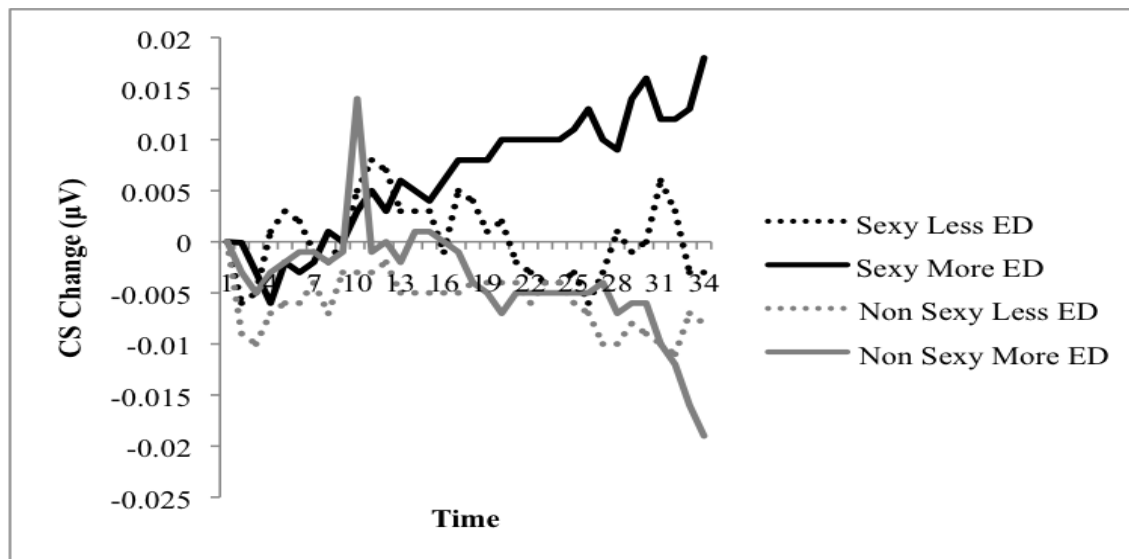

Figure 6. Corrugator Supercilii (CS) muscle activation change over times as a function of sexual appeal and energy density (ED)
